# Supplementary material
Source: MDPI journal article supplement (https://www.mdpi.com/1424-2818/15/12/1196)

Supplementary Figure S1. The ML tree was generated with IQ-TREE web server. The analysis includes 47 COI (658bp) sequences (16 from *H. julitta*, 5 from *H. g. grisea*, 23 from *H. g. glauconome*, and sequences of *H. februa*, *H. amphiclo*, and *H. feronia* as outgroup). The nodes are shown with bootstrap support.

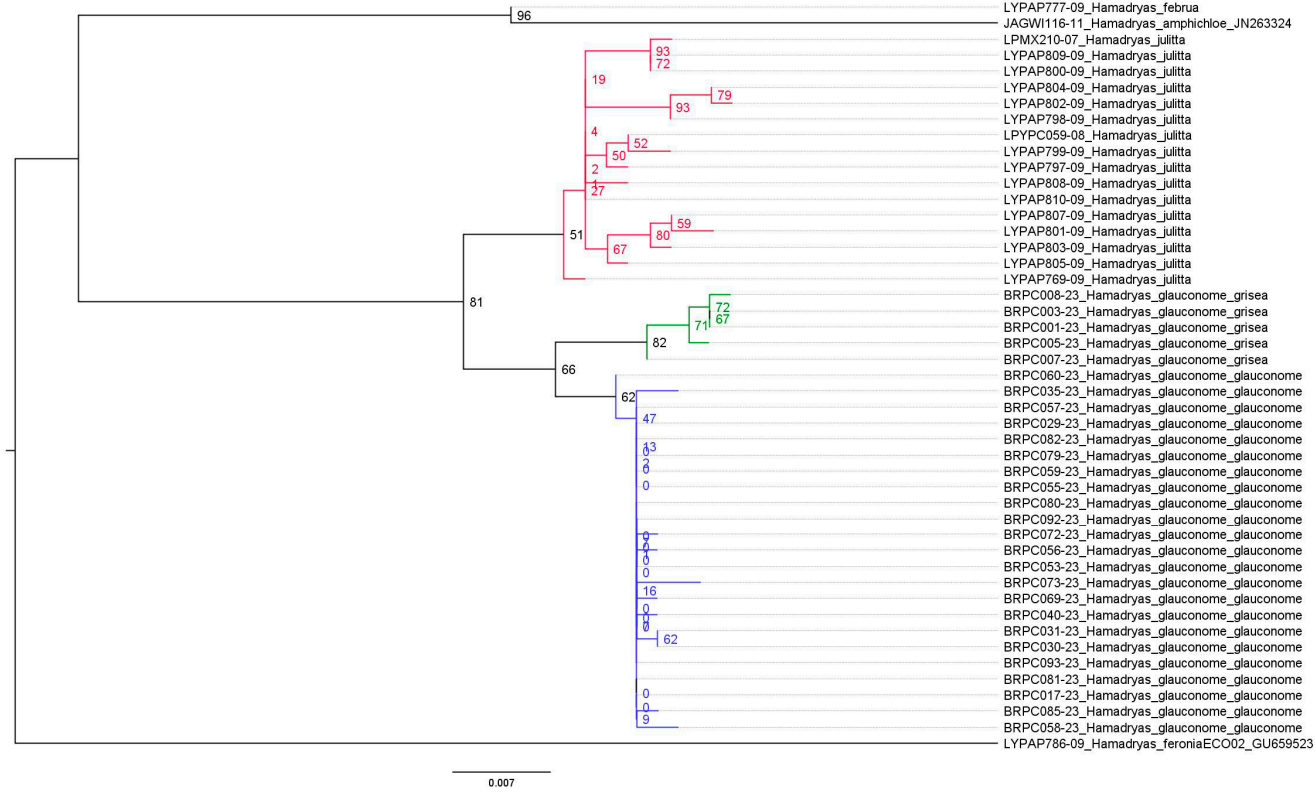

Supplement: s1 [file s1]
